# Supplementary material
Source: publisher site journal article supplement (https://static.cambridge.org/content/id/urn:cambridge.org:id:article:S1047951119003263/resource/name/S1047951119003263supp001.docx)
Supplement: Supplementary file 1 [file S1047951119003263supp001.docx]

SUPPLEMENTAL TABLE

**Supplemental Table 1.** Univariable and multivariable Cox proportional hazard models for prediction of time to death for patients who have undergone surgery stage 1 (n=121).

| Predictor | Missing data | Value | Events n (%) | Univariable analyses  Hazard Ratio (95% CI) | P-value | Interaction with gender  Hazard Ratio (95% CI) p-value | Interaction with calendar period  Hazard Ratio (95% CI) p-value | Multivariable analysis  Hazard Ratio (95% CI) | P-value |
| --- | --- | --- | --- | --- | --- | --- | --- | --- | --- |
| Age at surgery I (days) | 0 | Risk by 1 unit increase | 61 (50.4%) | 1.01 (0.96 - 1.06) | 0.76 | p=0.054 | p=0.10 |  |  |
| Gender | 0 | Male | 35 (42.2%) |  |  |  |  |  |  |
|  |  | Female | 26 (68.4%) | 2.25 (1.35 - 3.76) | 0.0018 |  | p=0.70 | BWSD=-2:1.11 (0.49 - 2.53) BWSD=-1:2.43 (1.44 - 4.12) BWSD=-0.5:3.60 (1.82 - 7.12) | 0.0006 |
| Gestational age | 2 | Risk by 1 units increase | 61 (51.3%) | 0.96 (0.83 - 1.11) | 0.61 | p=0.79 | Period 1,2: 1.11 (0.91 - 1.36) Period 3,4: 0.73 (0.56 - 0.93) p=0.0095 |  |  |
| Premature | 2 | No | 59 (51.8%) |  |  |  |  |  |  |
|  |  | Yes | 2 (40.0%) | 0.76 (0.19 - 3.11) | 0.70 | p=0.99 | p=0.99 |  |  |
| Birth weight (kg) | 1 | Risk by 0.5 unit increase | 61 (50.8%) | 0.70 (0.55 - 0.89) | 0.0044 | p=0.094 | p=0.18 |  |  |
| Birth weight (kg) ≤2.5 | 1 | Risk by 0.5 unit increase for values ≤2.5 | 61 (50.8%) | 0.60 (0.41 - 0.88) | 0.0088 | p=0.41 | p=0.073 |  |  |
| Birth weight (kg) >2.5 |  | Risk by 0.5 unit increase for values >2.5 |  | 0.92 (0.52 - 1.62) | 0.77 | p=0.26 | p=0.35 |  |  |
| Birth weight SDS | 1 | Risk by 0.5 unit increase | 61 (50.8%) | 0.82 (0.72 - 0.94) | 0.0033 | Male: 0.71 (0.59 - 0.85) Female: 0.99 (0.83 - 1.18) p=0.0090 | p=0.91 |  |  |
| Birth weight SDS ≤-0.46 | 1 | Risk by 0.5 unit increase for values ≤-0.46 | 61 (50.8%) | 0.73 (0.60 - 0.89) | 0.0019 | Male: 0.64 (0.49 - 0.84) Female: 0.95 (0.71 - 1.28) p=0.050 | p=0.97 | Male:0.64 (0.50 - 0.81) Female:0.94 (0.70 - 1.27) | 0.0003 Interaction with sex:0.033 |
| Birth weight SDS >-0.46 |  | Risk by 0.5 unit increase for values >-0.46 |  | 1.04 (0.76 - 1.42) | 0.80 | p=0.71 | p=0.78 | 1.01 (0.56 - 1.82) | 0.96 |
| Birth length (cm) | 13 | Risk by 1 unit increase | 58 (53.7%) | 0.91 (0.82 - 1.01) | 0.080 | p=0.34 | Period 1,2: 1.05 (0.89 - 1.22) Period 3,4: 0.82 (0.71 - 0.93) p=0.019 |  |  |
| Birth length SDS | 13 | Risk by 0.5 unit increase | 58 (53.7%) | 0.93 (0.83 - 1.04) | 0.19 | p=0.076 | p=0.17 |  |  |
| Birth head circumference (cm) | 38 | Risk by 1 unit increase | 46 (55.4%) | 0.75 (0.61 - 0.92) | 0.0068 | p=0.44 | p=0.56 |  |  |
| Birth head circumference SDS | 38 | Risk by 0.5 unit increase | 46 (55.4%) | 0.90 (0.78 - 1.03) | 0.13 | p=0.34 | p=0.91 |  |  |
| Birth head circumference/birth weight ratio | 38 | Risk by 1 unit increase | 46 (55.4%) | 1.38 (1.14 - 1.66) | 0.0010 | Male: 1.90 (1.45 - 2.49) Female: 0.90 (0.66 - 1.22) p=0.0003 | p=0.60 |  |  |
| Birth period | 0 | 1993-2000 | 38 (63.3%) |  |  |  |  |  |  |
|  |  | 2001-2010 | 23 (37.7%) | 0.50 (0.30 - 0.85) | 0.010 | p=0.70 |  | 0.56 (0.33 - 0.95) | 0.031 |
| Pre-natal diagnosis | 0 | No | 51 (51.5%) |  |  |  |  |  |  |
|  |  | Yes | 10 (45.5%) | 0.84 (0.43 - 1.66) | 0.62 | p=0.067 | p=0.29 |  |  |
| Surgical center | 0 | Göteborg | 37 (53.6%) |  |  |  |  |  |  |
|  |  | Lund | 24 (46.2%) | 0.78 (0.46 - 1.30) | 0.33 | p=0.87 | p=0.49 |  |  |
| Diagnosis of malformations | 0 | No | 58 (50.4%) |  |  |  |  |  |  |
|  |  | Yes | 3 (50.0%) | 1.03 (0.32 - 3.29) | 0.96 | p=0.18 | p=0.69 |  |  |
| Harrell's c-statistics (95% CI) for the multivariable model = 0.71 (0.45 - 0.91) | | | | | | | | | |
